# Supplementary material
Source: PubMed Central journal article supplement (PMC4198029)
Supplement: embj0033-1271-sd1.pdf [file embj0033-1271-sd1.pdf]

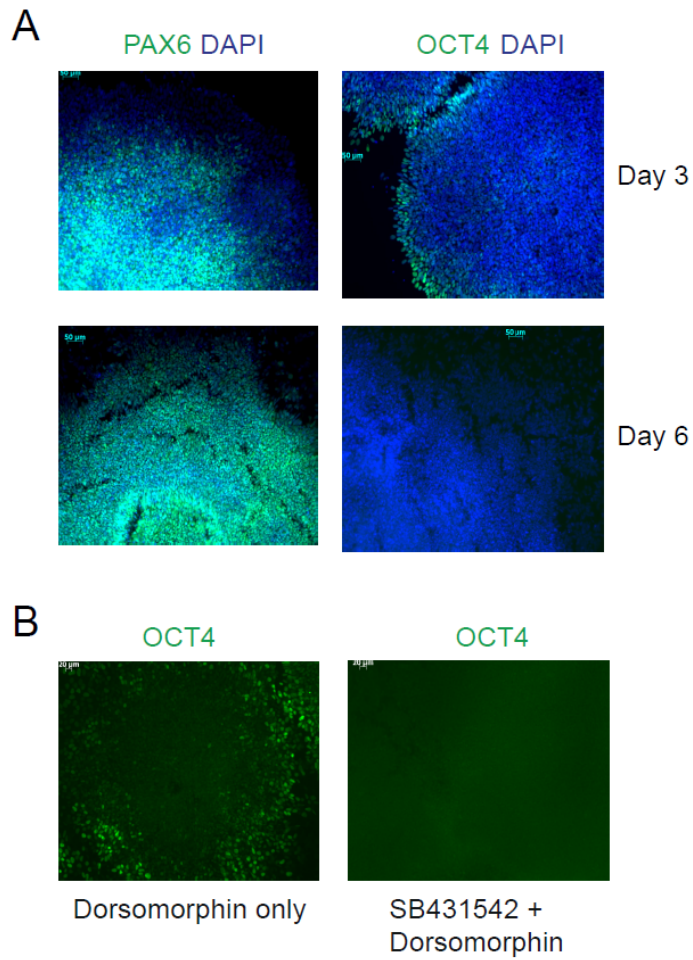

**Figure S1. Expression of PAX6 and OCT4 during neural differentiation of hESC using SB431542 and Dorsomorphin.**

A. Immunostaining for PAX6 and OCT4 at day 3 and day 6 of neural differentiation of hESC. B. Comparison of OCT4 expression at Day 6 when hESC colonies were treated with Dorsomorphin or Dorsomorphin + SB431542.
