# Supplementary material
Source: PubMed Central journal article supplement (PMC4198029)
Supplement: embj0033-1271-sd2.pdf [file embj0033-1271-sd2.pdf]

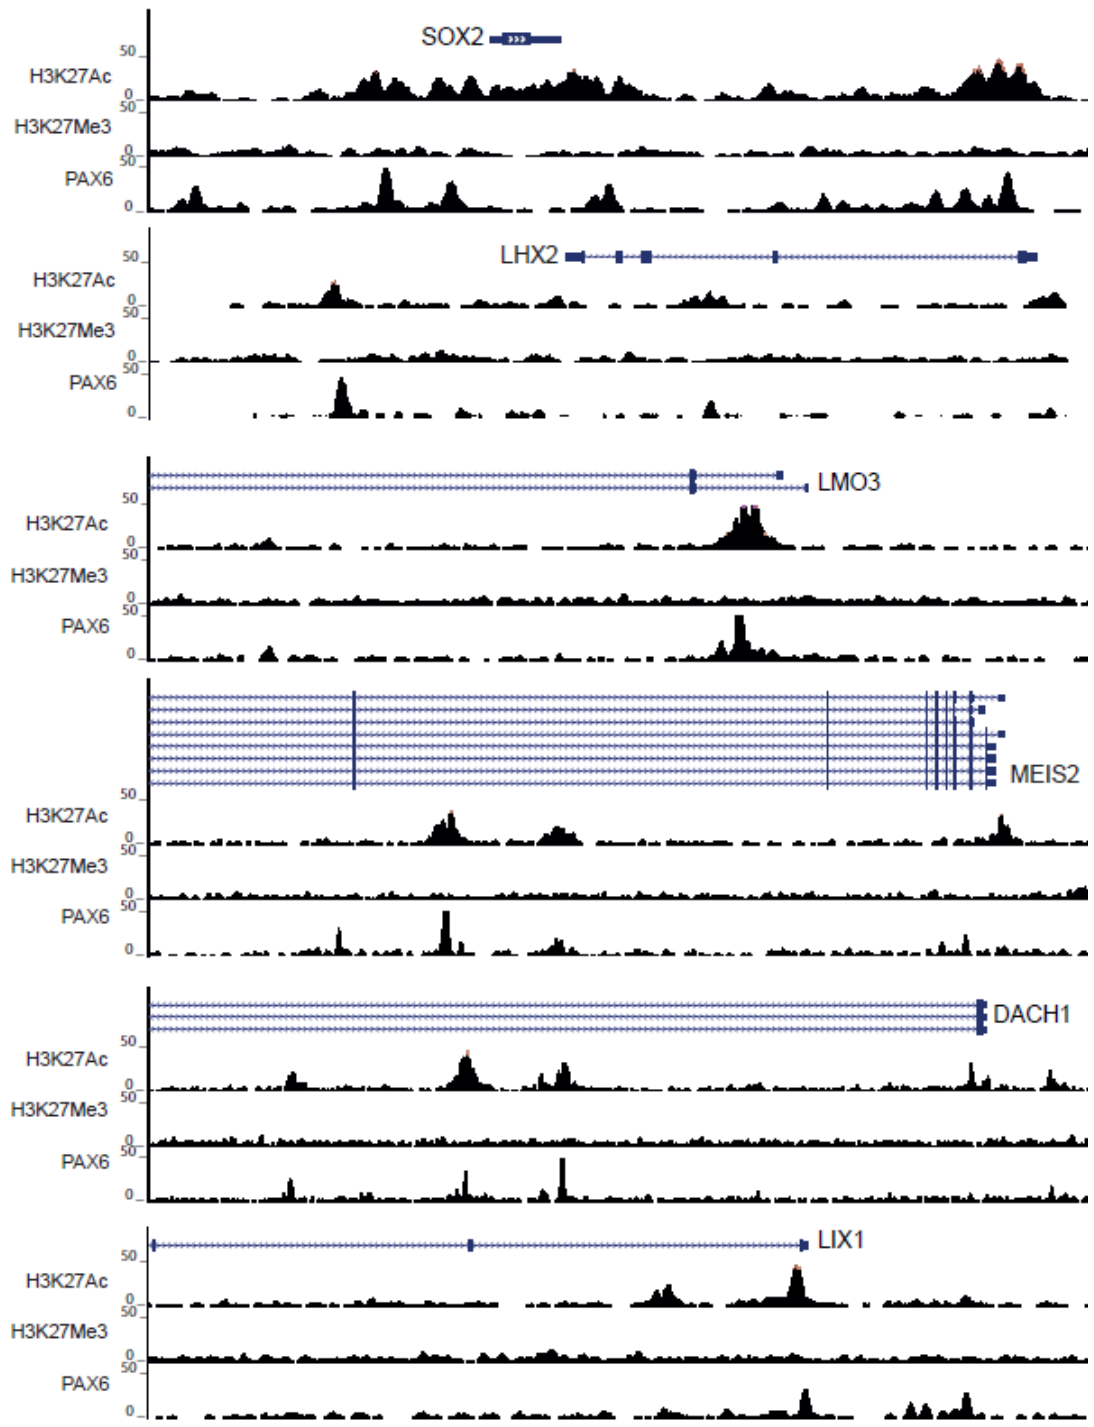

Figure S2. PAX6 regulates neural TFs.

Genome browser snapshots of ChIP-Seq data for PAX6 near several genes implicated in neuroectoderm development. Also shown is the ChIP-Seq signal for H3K27Ac and H3K27Me3 in NEC.

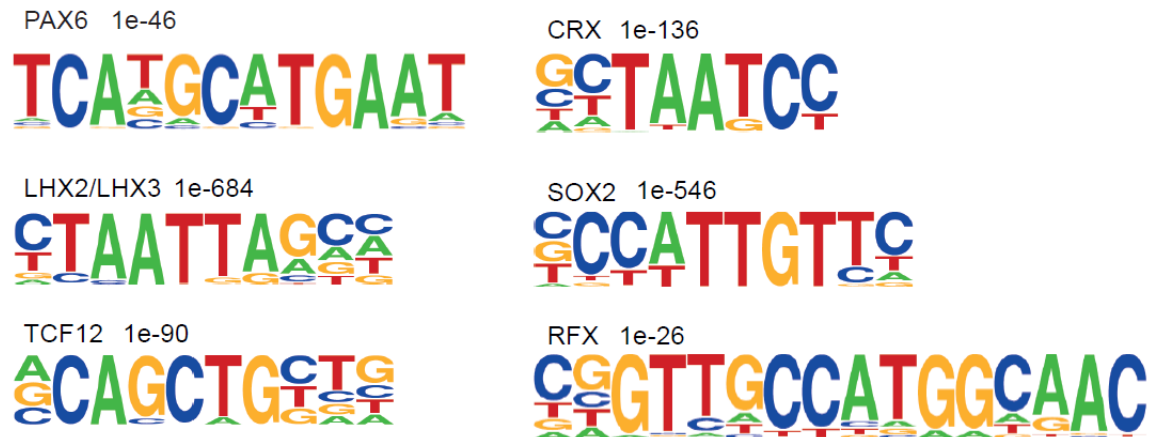

**Figure E3. Motif analysis of PAX6 binding sites**

Motifs enriched within PAX6 binding sites that match to known motifs for PAX6 and other TFs and their corresponding P-values.
