# Supplementary material
Source: PubMed Central journal article supplement (PMC4198029)
Supplement: embj0033-1271-sd3.pdf [file embj0033-1271-sd3.pdf]

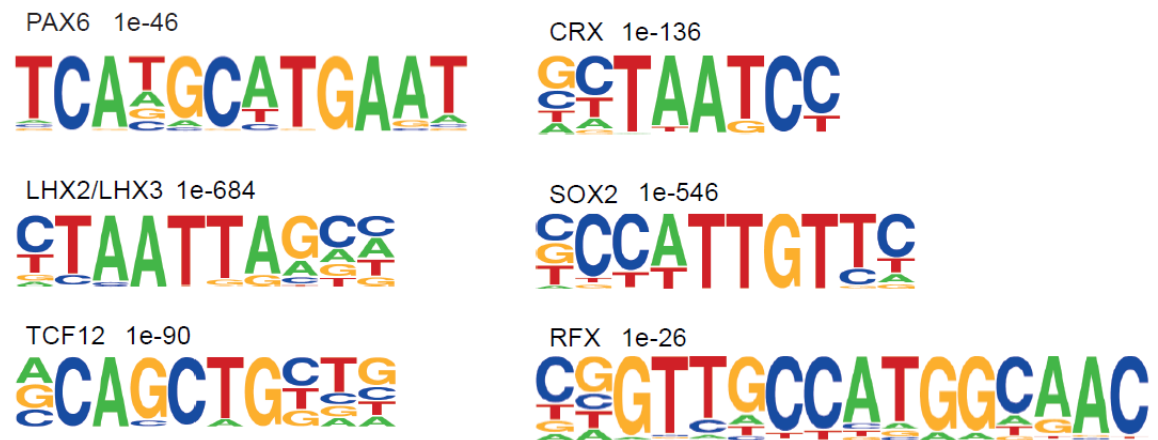

**Figure S3. Motif analysis of PAX6 binding sites**

Motifs enriched within PAX6 binding sites that match to known motifs for PAX6 and other TFs and their corresponding P-values.
