# Supplementary material
Source: PubMed Central journal article supplement (PMC4198029)
Supplement: embj0033-1271-sd4.pdf [file embj0033-1271-sd4.pdf]

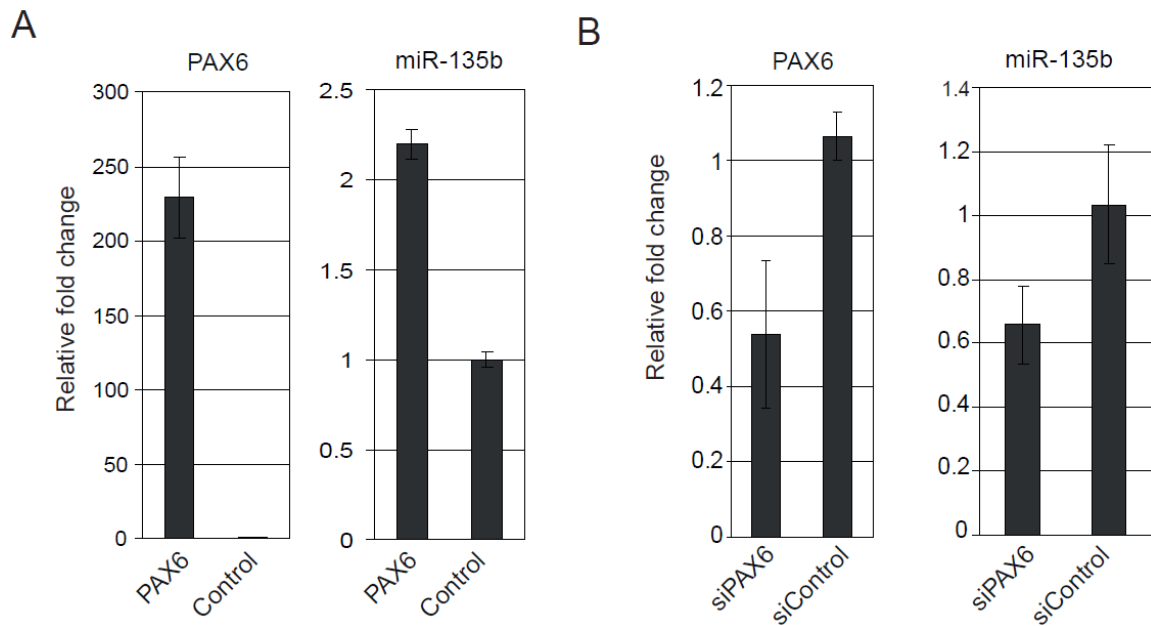

**Figure S4. PAX6 overexpression and knockdown in differentiating H9 ESC**

A. PAX6 overexpression in differentiating ESC leads to upregulation of miR-135b. B. PAX6 knockdown in differentiating ESC leads to downregulation of miR-135b. MiR-135b expression was quantified by quantitative RT-PCR using TaqMan assays. PAX6 expression was quantified by SYBR green. All Error bars shown indicate s.e.m (n=3 independent experiments).
