# Supplementary material
Source: PubMed Central journal article supplement (PMC4198029)
Supplement: embj0033-1271-sd5.pdf [file embj0033-1271-sd5.pdf]

A

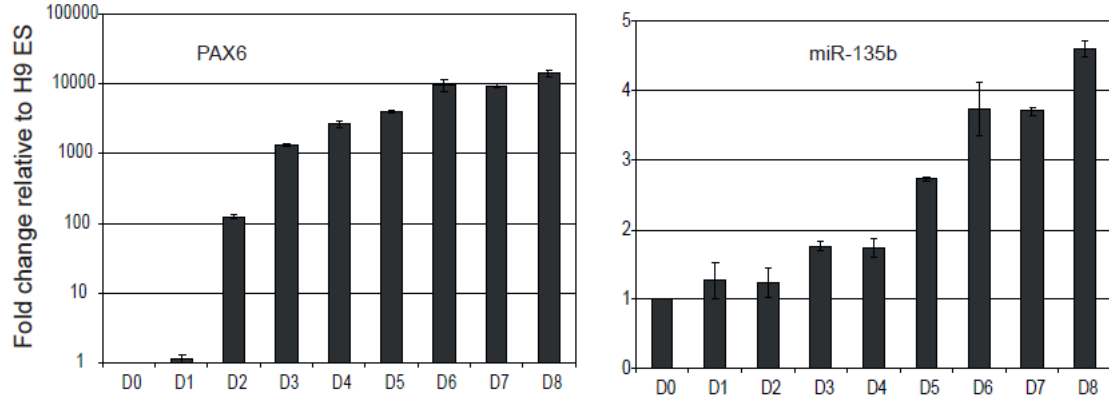

B

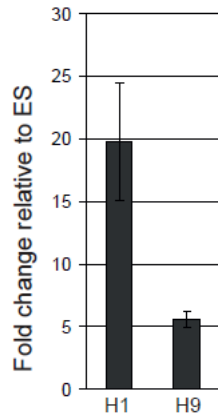

**Figure S5. Expression of miR-135b during neural differentiation of hESC**

A. Expression of miR-135b and PAX6 during the differentiation of H9 ESC to NEC by the 2i method B. Expression of miR-135b in NEC differentiated from H1 and H9 hESC by the 3i method. MiR-135b expression was quantified by quantitative RT-PCR using TaqMan assays. PAX6 expression was quantified by SYBR green. All Error bars shown indicate s.e.m (n=3 independent experiments).
