# Supplementary material
Source: PubMed Central journal article supplement (PMC4198029)
Supplement: embj0033-1271-sd6.pdf [file embj0033-1271-sd6.pdf]

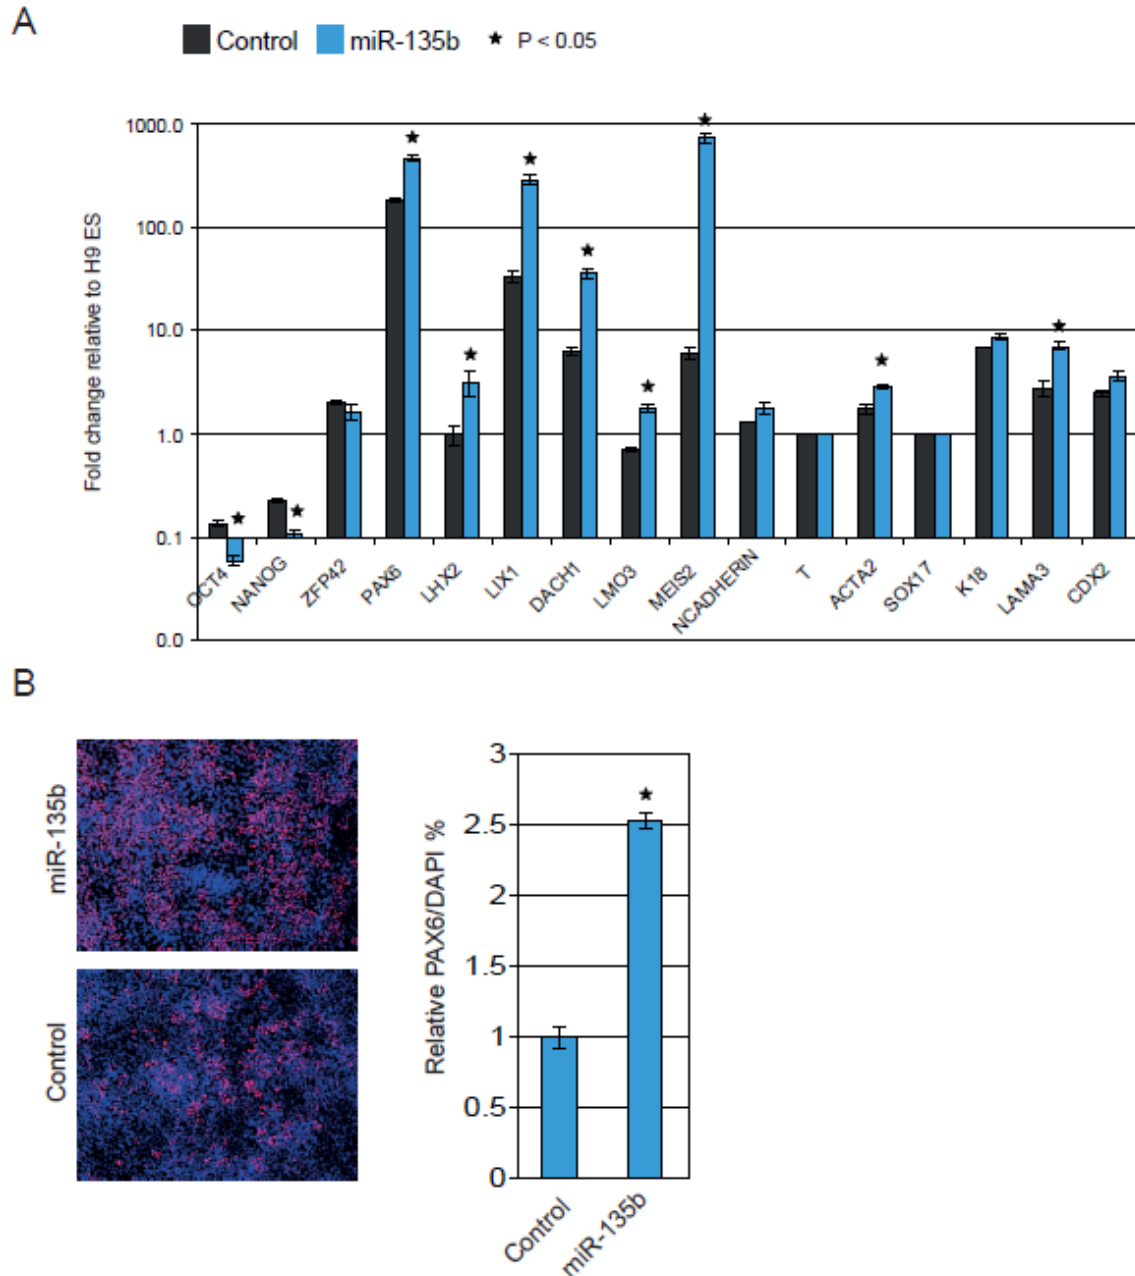

**Figure S6. MiR-135b overexpression promotes neural differentiation in H9 ESC**

A. Quantitative RT-PCR data to measure gene expression changes after miR-135b transfection. Fold changes were compared to untransfected H9 ESC. B. Immunostaining for PAX6 in miR-135b transfected H9 ES cells at day 6 after induction of differentiation.

All Error bars shown indicate s.e.m (n=3 independent experiments). Images were quantified as described in Materials and Methods in the main text.
