# Supplementary material
Source: PubMed Central journal article supplement (PMC4198029)
Supplement: embj0033-1271-sd7.pdf [file embj0033-1271-sd7.pdf]

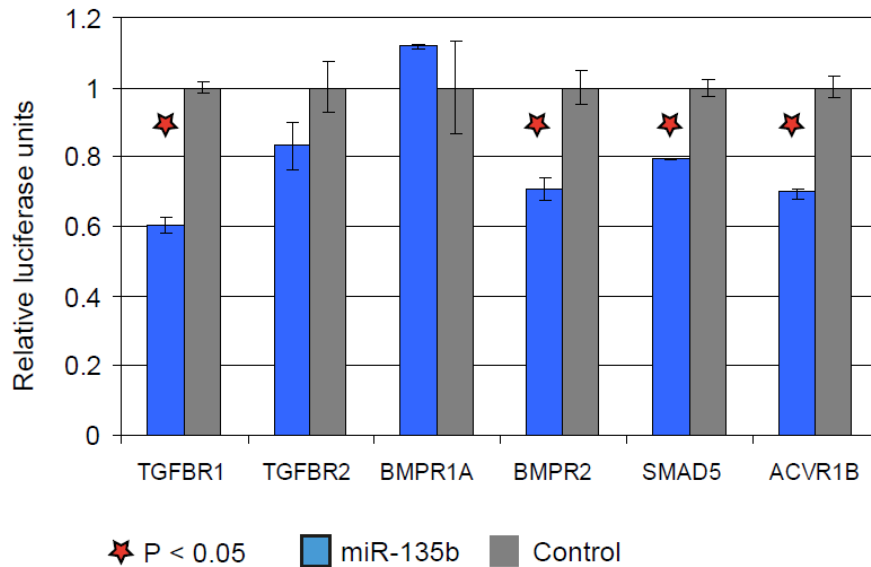

**Figure S7. 3'UTR luciferase assays for miR-135b targets.**

Relative luciferase expression of wild type UTR bearing luciferase vectors for the indicated genes were co-transfected with miR-135b or control shRNA expression vectors. Relative luciferase ratios were normalized to control shRNA transfections. (All changes were significant at  $P < 0.05$ ,  $n=3$  independent experiments).
