# Supplementary material
Source: PubMed Central journal article supplement (PMC4198029)
Supplement: embj0033-1271-sd8.pdf [file embj0033-1271-sd8.pdf]

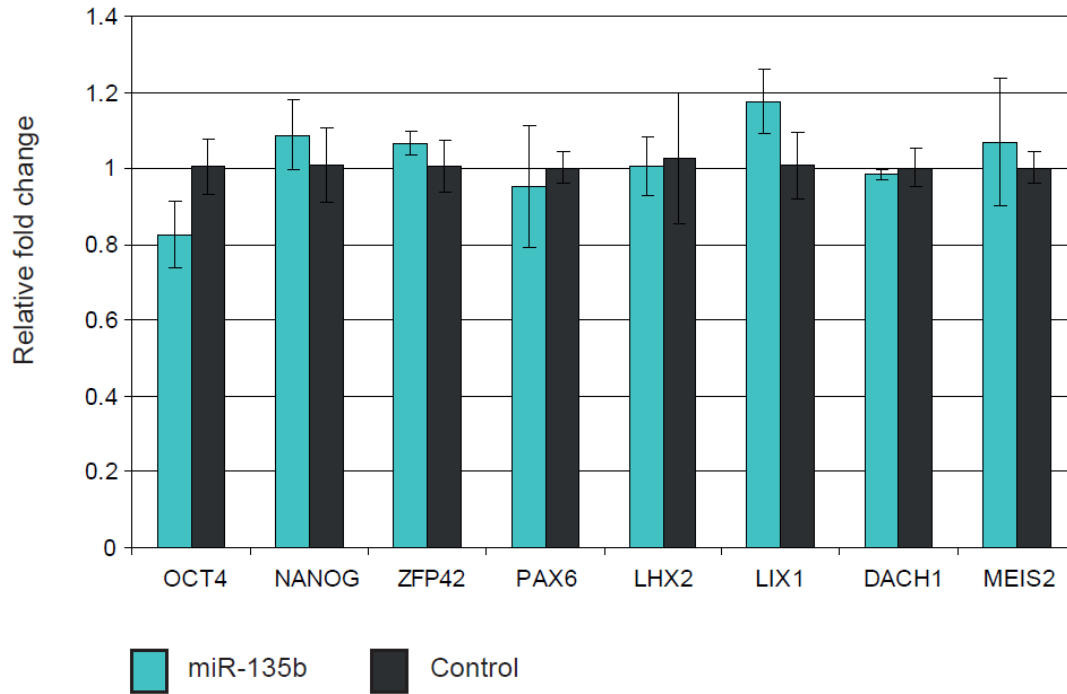

**Figure S8. MiR-135b alone is unable to overcome pluripotency signals in H1 ESC**

Quantitative RT-PCR data to measure gene expression changes after miR-135b transfection into H1 ESC. Cells were harvested 120 hours post-transfection. All Error bars shown indicate s.e.m (n=3 independent experiments).
