# Supplementary material
Source: PubMed Central journal article supplement (PMC4198029)
Supplement: embj0033-1271-sd9.pdf [file embj0033-1271-sd9.pdf]

Table S1. qRT-PCR primers

| Gene      | Forward primer            | Reverse primer            |
|-----------|---------------------------|---------------------------|
| PAX6      | TCTTTGCTTGGGAAATCCG       | CTGCCCGTTCAACATCCTTAG     |
| NANOG     | ATTCTTCCACCAGTCCCAA       | ATCTGCTGGAGGCTGAGGTA      |
| OCT4      | ACATCAAAGCTCTGCAGAAAGAACT | CTGAATACCTTCCCAAATAGAACCC |
| SOX2      | GCCCTGCAGTACAACCTCCAT     | TGGAGTGGGAGGAAGAGGTA      |
| BRACHYURY | CTATTCTGACAACCTCACCTGCAT  | ACAGGCTGGGGTACTGACT       |
| DACH1     | GGTGGTGTGCAATGTGGA        | ATGCGGCATGATGTGAGAG       |
| LIX1      | GGAATTTTGGGAAAGCAAGC      | CAGCACTGAAAGTTGCCAAA      |
| NCADHERIN | TCCTGATATATGCCCAAGACAA    | TGACCCAGTCTCTCTTCTGC      |
| LHX2      | TTACGGCAGGAAAACACGG       | TGCCAGGCACAGAAGTTAAG      |
| LMO3      | AAGGCACTGGACAAATACTGG     | CACGCATCACCATCTCAAAG      |
| MEIS2     | CCAGGGGACTACGTTTCTCA      | TAACATTGTGGGGCTCTGTG      |
| SIX3      | ACTACCAGGAGGCCGAGAAG      | CAGTTCGCGTTTCTTGCTG       |
| SIX6      | AACAAGAATGAGTCGGTGCT      | CAGCGGGAACCTTCTTCCTTA     |
| FABP7     | ACAGAAATGGGATGGCAAAG      | CTCATAGTGGCGAACAGCAA      |
| MSI1      | GCCCAAGATGGTGACTCG        | ATGGCGTCGTCCACCTTC        |
| NESTIN    | GCCTTCTGGCTCAGAGGAAGAGT   | TCCCCTCCAAGTTGGGACCCT     |
| SOX1      | GCCCAGGAGAACCCCAAG        | CGTCTTGGTCTTGCGGC         |
| SOX17     | ATACGCCAGTGACGACCAG       | GCGGCCGGTACTTGTAGTT       |
| K18       | ATGCGCCAGTCTGTGGAG        | CCTGAGATTGGGGGCATC        |
| LAMA3     | TGTTAATCGGGCAACACAAA      | GGTGCTTTCCAAAGTTCCTG      |
| CDX2      | TGGAGCTGGAGAAGGAGTTT      | CTGCTGCTGCTGTTGCTG        |
| NANOG     | ATGCCTCACACGGAGACTGT      | AAGTGGGTTGTTTGCCTTTG      |
| ZFP42     | TCTGAGTACATGACAGGCAAGAA   | TCTGATAGGTCAATGCCAGGT     |
| GAPDH     | CAGCCTCAAGATCATCAGCA      | TGTGGTCATGAGTCCTTCCA      |
| HPRT1     | TGCTCGAGATGTGATGAAGG      | AATCCAGCAGGTCAGCAAAG      |
| ACTB      | CCAACCGCGAGAAGATGA        | CCAGAGGCGTACAGGGATAG      |
| TGFBR1    | CACAGAGTGGGAACAAAAGGT     | CCAATGGAACATCGTCGAGCA     |
| BMPR2     | GACAGGAGACCGTAAACAAGG     | CCATATCGACCTCGGCCAATC     |
| SMAD5     | TCTCCAACAGCCCTTATCCC      | GCAGGAGGAGGCGTATCAG       |
| ACVR1B    | ATCATCAGCGTGTCTATCACAAC   | ACAAAGAGGGGTAACCCTGAG     |
