# Supplementary material
Source: PubMed Central journal article supplement (PMC4198029)
Supplement: embj0033-1271-sd10.pdf [file embj0033-1271-sd10.pdf]

Table S2. MicroRNAs regulated by PAX6 in NEC.

| Chr   | Peak Start | Peak End  | Peak Score | miRbase ID     | miR Start | Strand | Distance of peak to miR |
|-------|------------|-----------|------------|----------------|-----------|--------|-------------------------|
| chr1  | 162115274  | 162115474 | 55.3       | hsa-mir-4654   | 162126897 | +      | -11523                  |
| chr1  | 172112736  | 172112936 | 30.5       | hsa-mir-3120   | 172107948 | +      | 4888                    |
| chr1  | 243509851  | 243510051 | 44         | hsa-mir-4677   | 243509478 | +      | 473                     |
| chr1  | 33804143   | 33804343  | 15.8       | hsa-mir-3605   | 33798093  | -      | 6150                    |
| chr1  | 172112736  | 172112936 | 30.5       | hsa-mir-214    | 172108047 | -      | 4789                    |
| chr1  | 172112736  | 172112936 | 30.5       | hsa-mir-199a-2 | 172113784 | -      | -948                    |
| chr1  | 205417638  | 205417838 | 40.6       | hsa-mir-135b   | 205417526 | -      | 212                     |
| chr10 | 77301385   | 77301585  | 45.1       | hsa-mir-606    | 77312216  | +      | -10731                  |
| chr10 | 77302028   | 77302228  | 85.7       | hsa-mir-606    | 77312216  | +      | -10088                  |
| chr10 | 98910172   | 98910372  | 24.8       | hsa-mir-5686   | 98901440  | +      | 8832                    |
| chr10 | 103366960  | 103367160 | 23.7       | hsa-mir-3158-1 | 103361174 | +      | 5886                    |
| chr10 | 35926344   | 35926544  | 40.6       | hsa-mir-4683   | 35930180  | -      | -3736                   |
| chr10 | 103366960  | 103367160 | 23.7       | hsa-mir-3158-2 | 103361254 | -      | 5806                    |
| chr11 | 36023858   | 36024058  | 10.2       | hsa-mir-3973   | 36031648  | +      | -7690                   |
| chr11 | 96075830   | 96076030  | 25.9       | hsa-mir-1260b  | 96074602  | +      | 1328                    |
| chr12 | 54735352   | 54735552  | 22.6       | hsa-mir-148b   | 54731000  | +      | 4452                    |
| chr12 | 97954061   | 97954261  | 37.2       | hsa-mir-135a-2 | 97957590  | +      | -3429                   |
| chr13 | 66793844   | 66794044  | 75.6       | hsa-mir-4704   | 66792382  | +      | 1562                    |
| chr13 | 66799005   | 66799205  | 15.8       | hsa-mir-4704   | 66792382  | +      | 6723                    |
| chr14 | 101306739  | 101306939 | 41.7       | hsa-mir-770    | 101318727 | +      | -11888                  |
| chr15 | 96867098   | 96867298  | 45.1       | hsa-mir-1469   | 96876490  | +      | -9292                   |
| chr15 | 96883860   | 96884060  | 18.1       | hsa-mir-1469   | 96876490  | +      | 7470                    |
| chr15 | 96886313   | 96886513  | 18.1       | hsa-mir-1469   | 96876490  | +      | 9923                    |
| chr15 | 23810368   | 23810568  | 19.2       | hsa-mir-4508   | 23807278  | -      | 3190                    |
| chr17 | 27704005   | 27704205  | 13.5       | hsa-mir-4523   | 27717680  | +      | -13575                  |
| chr17 | 57243505   | 57243705  | 13.5       | hsa-mir-301a   | 57228582  | -      | 15023                   |
| chr17 | 79374064   | 79374264  | 13.5       | hsa-mir-4740   | 79374578  | -      | -414                    |
| chr2  | 12859253   | 12859453  | 19.2       | hsa-mir-3125   | 12877493  | +      | -18140                  |
| chr2  | 228328357  | 228328557 | 13.5       | hsa-mir-5703   | 228336848 | +      | -8391                   |
| chr2  | 11694392   | 11694592  | 10.2       | hsa-mir-4429   | 11680803  | -      | 13689                   |
| chr2  | 56236412   | 56236612  | 36.1       | hsa-mir-216b   | 56227930  | -      | 8582                    |
| chr2  | 56242995   | 56243195  | 12.4       | hsa-mir-216b   | 56227930  | -      | 15165                   |
| chr2  | 66589892   | 66590092  | 66.6       | hsa-mir-4778   | 66585460  | -      | 4532                    |
| chr2  | 161283249  | 161283449 | 21.4       | hsa-mir-4785   | 161264393 | -      | 18956                   |
| chr3  | 20183405   | 20183605  | 48.5       | hsa-mir-3135a  | 20179057  | +      | 4448                    |
| chr3  | 20183405   | 20183605  | 48.5       | hsa-mir-3135a  | 20179057  | +      | 4448                    |
| chr3  | 50206004   | 50206204  | 23.7       | hsa-mir-566    | 50210759  | +      | -4655                   |
| chr3  | 5303197    | 5303397   | 14.7       | hsa-mir-4790   | 5291940   | -      | 11357                   |
| chr3  | 52345601   | 52345801  | 10.2       | hsa-mir-135a-1 | 52328324  | -      | 17377                   |
| chr4  | 7300744    | 7300944   | 28.2       | hsa-mir-4798   | 7312177   | +      | -11333                  |
| chr4  | 7301231    | 7301431   | 30.5       | hsa-mir-4798   | 7312177   | +      | -10846                  |
| chr4  | 28811273   | 28811473  | 13.5       | hsa-mir-4275   | 28821204  | +      | -9831                   |
| chr4  | 87465253   | 87465453  | 28.2       | hsa-mir-4452   | 87463705  | -      | 1648                    |
| chr6  | 30848592   | 30848792  | 11.3       | hsa-mir-4640   | 30858660  | +      | -9968                   |

|      |           |           |      |               |           |   |       |
|------|-----------|-----------|------|---------------|-----------|---|-------|
| chr7 | 93106044  | 93106244  | 20.3 | hsa-mir-653   | 93112167  | - | -6023 |
| chr7 | 93106044  | 93106244  | 20.3 | hsa-mir-489   | 93113331  | - | -7187 |
| chr7 | 151125978 | 151126178 | 25.9 | hsa-mir-3907  | 151130725 | - | -4647 |
| chr8 | 125841109 | 125841309 | 40.6 | hsa-mir-4662a | 125834227 | + | 6982  |
| chr8 | 28355329  | 28355529  | 14.7 | hsa-mir-4288  | 28362699  | - | -7270 |
| chr8 | 28363190  | 28363390  | 14.7 | hsa-mir-4288  | 28362699  | - | 591   |
| chr8 | 28363960  | 28364160  | 14.7 | hsa-mir-4288  | 28362699  | - | 1361  |
| chr8 | 28371430  | 28371630  | 20.3 | hsa-mir-4288  | 28362699  | - | 8831  |
| chr8 | 28371430  | 28371630  | 20.3 | hsa-mir-4288  | 28362699  | - | 8831  |
| chr8 | 125841109 | 125841309 | 40.6 | hsa-mir-4662b | 125834300 | - | 6909  |
| chr8 | 130492703 | 130492903 | 18.1 | hsa-mir-3686  | 130496388 | - | -3585 |
| chr9 | 124876066 | 124876266 | 11.3 | hsa-mir-4478  | 124882446 | - | -6280 |
| chrX | 17453747  | 17453947  | 10.2 | hsa-mir-4768  | 17444004  | + | 9843  |
| chrX | 133308258 | 133308458 | 16.9 | hsa-mir-363   | 133303482 | - | 4876  |
| chrX | 133308258 | 133308458 | 16.9 | hsa-mir-92a-2 | 133303642 | - | 4716  |
| chrX | 133308258 | 133308458 | 16.9 | hsa-mir-19b-2 | 133303796 | - | 4562  |
| chrX | 133308258 | 133308458 | 16.9 | hsa-mir-20b   | 133303907 | - | 4451  |
| chrX | 133308258 | 133308458 | 16.9 | hsa-mir-18b   | 133304141 | - | 4217  |
| chrX | 133308258 | 133308458 | 16.9 | hsa-mir-106a  | 133304308 | - | 4050  |
